# Supplementary material for: Bifunctional tetrazole–carboxylate ligand based Zn(ii) complexes: synthesis and their excellent potential anticancer properties
Source: Royal Society of Chemistry journal article supplement (doi:10.1039/d2ra04768c), 2022-01-01
Supplement: d2ra04768c1.pdf [file d2ra04768c1.pdf]

Electronic Supplementary Information (ESI) for  
**Bifunctional tetrazole-carboxylate ligands based Zn(II) complexes:**  
**Synthesis and their excellent potential anticancer properties**

Li-Tao Tan,<sup>‡a</sup> Ting-Xiao Shen,<sup>‡a</sup> Jing-Yi Jiang,<sup>b</sup> Yu-Jie Zhong,<sup>a</sup> Fang-Qi Lin,<sup>b</sup> Hong  
Xue,<sup>b</sup> Yu-Xin Yao,<sup>a</sup> Xin Jiang,<sup>c,\*</sup> Lei Shen,<sup>a,\*</sup> Xin He<sup>d,\*</sup>

<sup>a</sup> Jiangsu Laboratory of Advanced Functional Materials, College of Material Engineering, Changshu Institute of Technology, Changshu, 215500, P. R. China

<sup>b</sup> School of Pharmacy, Guilin Medical University, Guilin 541004, Guangxi, P. R. China

<sup>c</sup> Affiliated Hospital of Guilin Medical University, Guilin 541000, Guangxi, P. R. China

<sup>d</sup> Department of Chemistry and Academy for Advanced Interdisciplinary Studies, Southern University of Science and Technology (SUSTech), Shenzhen 518055, P. R. China

<sup>‡</sup> These authors contributed equally to this work and should be considered co-first authors.

**Table S1** Selected crystallographic data and structure refinement for **1-2**

| Complex                    | <b>1</b>                                                           | <b>2</b>                                                          |
|----------------------------|--------------------------------------------------------------------|-------------------------------------------------------------------|
| Empirical formula          | C <sub>31</sub> H <sub>36</sub> N <sub>15</sub> O <sub>12</sub> Zn | C <sub>16</sub> H <sub>20</sub> N <sub>10</sub> O <sub>8</sub> Zn |
| Formula mass               | 876.12                                                             | 545.81                                                            |
| Crystal system             | triclinic                                                          | triclinic                                                         |
| Space group                | $P\bar{1}$                                                         | $P\bar{1}$                                                        |
| <i>a</i> (Å)               | 10.823 (2)                                                         | 7.1354 (14)                                                       |
| <i>b</i> (Å)               | 11.011 (2)                                                         | 9.3422 (19)                                                       |
| <i>c</i> (Å)               | 16.851 (3)                                                         | 10.662 (2)                                                        |
| $\alpha$ (°)               | 78.57 (3)                                                          | 64.51 (3)                                                         |
| $\beta$ (°)                | 73.87 (3)                                                          | 72.84 (3)                                                         |
| $\gamma$ (°)               | 80.02 (3)                                                          | 79.91 (3)                                                         |
| <i>V</i> (Å <sup>3</sup> ) | 1875.9 (6)                                                         | 612.0 (2)                                                         |
| <i>Z</i>                   | 2                                                                  | 1                                                                 |

|                                                                                                         |                |                |
|---------------------------------------------------------------------------------------------------------|----------------|----------------|
| <i>T</i> /K                                                                                             | 291(2)         | 291(2)         |
| <i>D</i> <sub>calcd</sub> (g.cm <sup>-3</sup> )                                                         | 1.549          | 1.481          |
| <i>u</i> (mm <sup>-1</sup> )                                                                            | 0.738          | 1.06           |
| Reflections collected                                                                                   | 17674          | 6435           |
| Unique Reflections( <i>R</i> <sub>int</sub> )                                                           | 6572(0.045)    | 2794(0.033)    |
| No. Observations ( <i>I</i> > 2.00)                                                                     | 4647           | 2347           |
| No. Variables                                                                                           | 519            | 165            |
| <i>R</i> <sub>1</sub> <sup>[a]</sup> <i>wR</i> <sub>2</sub> <sup>[b]</sup> ( <i>I</i> > 2σ( <i>I</i> )) | 0.0729, 0.2166 | 0.0496, 0.1339 |
| GOF <sup>c</sup>                                                                                        | 1.395          | 0.997          |
| Δ/ <i>ρ</i> <sub>max</sub> (e/Å <sup>3</sup> )                                                          | 1.135          | 0.400          |
| Δ/ <i>ρ</i> <sub>min</sub> (e/Å <sup>3</sup> )                                                          | -0.899         | -0.400         |

$$^{[a]}R = \sum ||F_o| - |F_c|| / \sum |F_o|.$$

$$^{[b]}Rw = \{ \sum w(F_o^2 - F_c^2)^2 / \sum w(F_o^2)^2 \}^{1/2}.$$

<sup>[c]</sup> GOF =  $\{ \sum w((F_o^2 - F_c^2)^2) / (n-p) \}^{1/2}$ , where *n* = number of reflections and *p* = total numbers of parameters refined.

Table S2 Selected bond distances and angles for 1-2 (Å/°)

|                  |             |             |            |
|------------------|-------------|-------------|------------|
| <b>Complex 1</b> |             |             |            |
| Zn1–O3A          | 2.089(4)    | Zn1–O1      | 2.106(4)   |
| Zn1–O7           | 2.136(3)    | Zn1–N14     | 2.157(4)   |
| Zn1–N15          | 2.163(4)    | Zn1–N13     | 2.187(4)   |
| O3A–Zn1–O1       | 175.92(14)  | O3A–Zn1–O7  | 93.41(16)  |
| O1–Zn1–O7        | 90.10(15)   | O3A–Zn1–N14 | 90.33(15)  |
| O1–Zn1–N14       | 91.78(15)   | O7–Zn1–N14  | 89.66(15)  |
| O3A–Zn1–N15      | 90.58(15)   | O1–Zn1–N15  | 87.19(15)  |
| O7–Zn1–N15       | 92.35(15)   | N14–Zn1–N15 | 177.74(17) |
| O3A–Zn1–N13      | 86.54(15)   | O1–Zn1–N13  | 90.00(15)  |
| O7–Zn1–N13       | 178.60(14)  | N14–Zn1–N13 | 88.94(16)  |
| N15–Zn1–N13      | 89.05(16)   |             |            |
| <b>Complex 2</b> |             |             |            |
| Zn1–O5           | 2.0793 (17) | Zn1–O1C     | 2.083 (2)  |
| Zn1–O5A          | 2.0793 (17) | Zn1–N5A     | 2.213 (3)  |
| Zn1–O1B          | 2.083 (2)   | Zn1–N5      | 2.213 (3)  |
| O5–Zn1–N5A       | 87.49 (9)   | O5A–Zn1–O1B | 89.50 (8)  |
| O5A–Zn1–N5A      | 92.51 (9)   | O5–Zn1–O1C  | 89.50 (8)  |
| O1B–Zn1–N5A      | 90.18 (9)   | O5–Zn1–N5   | 92.51 (9)  |
| O1C–Zn1–N5A      | 89.82 (9)   | O5A–Zn1–N5  | 87.49 (9)  |
| O5A–Zn1–O1C      | 90.50 (8)   | O1B–Zn1–N5  | 89.82 (9)  |

|             |            |            |             |
|-------------|------------|------------|-------------|
| O1B–Zn1–O1C | 180.00     | O1C–Zn1–N5 | 90.18*(9)   |
| O5–Zn1–O5A  | 180.00*(7) | N5A–Zn1–N5 | 180.00*(14) |
| O5–Zn1–O1B  | 90.50*(8)  |            |             |

Symmetry code:

For 1: A:  $-x, -y+1, -z+1$ .

For 2 :A:  $-x+1, -y, -z$ ; B:  $-x+1, -y+1, -z-1$ ; C:  $x, y-1, z+1$ .

Table S3 Hydrogen-bonding Geometry (Å and °) for 1-2

| <i>D-H...A</i>                     | <i>D-H</i> | <i>H...A</i> | <i>[D...A]</i> | $\angle D-H...A$ |
|------------------------------------|------------|--------------|----------------|------------------|
| <b>Complex 1</b>                   |            |              |                |                  |
| O(7)–H(7A)···O(11) <sup>#1</sup>   | 0.85       | 1.79         | 2.633(17)      | 172              |
| O(7)–H(7A)···O(12) <sup>#2</sup>   | 0.85       | 2.45         | 2.845(9)       | 109              |
| O(7)–H(7B)···O(12) <sup>#2</sup>   | 0.85       | 2.51         | 2.845(9)       | 105              |
| O(8)–H(8D)···O(2) <sup>#3</sup>    | 0.85       | 1.99         | 2.580(10)      | 126              |
| O(8)–H(8E)···O(12)                 | 0.85       | 2.08         | 2.706(10)      | 130              |
| O(9)–H(9A)···O(4) <sup>#4</sup>    | 0.85       | 2.01         | 2.746(12)      | 145              |
| O(9)–H(9B)···O(8)                  | 0.85       | 2.54         | 3.036(15)      | 118              |
| O(10)–H(10A)···O(9) <sup>#5</sup>  | 0.85       | 1.95         | 2.589(17)      | 131              |
| O(10)–H(10A)···O(7) <sup>#6</sup>  | 0.85       | 2.01         | 2.720(10)      | 140              |
| O(11)–H(11C)···O(10)               | 0.85       | 1.77         | 2.22(2)        | 111              |
| O(11)–H(11E)···N(7) <sup>#7</sup>  | 0.85       | 2.59         | 3.014(18)      | 112              |
| O(12)–H(12A)···O(7) <sup>#2</sup>  | 0.85       | 2.57         | 2.845(9)       | 100              |
| O(12)–H(12A)···O(11) <sup>#8</sup> | 0.85       | 1.98         | 2.30(2)        | 101              |
| C(11)–H(11A)···N(9) <sup>#7</sup>  | 0.97       | 2.52         | 3.353(9)       | 144              |
| C(11)–H(11B)···O(9) <sup>#9</sup>  | 0.97       | 2.5          | 3.236(12)      | 132              |
| C(14)–H(14B)···O(12) <sup>#8</sup> | 0.97       | 2.47         | 3.427(12)      | 169              |
| C(19)–H(19A)···N(3) <sup>#10</sup> | 0.93       | 2.5          | 3.292(7)       | 143              |
| C(24)–H(24A)···O(4) <sup>#4</sup>  | 0.93       | 2.45         | 3.272(8)       | 147              |
| C(31)–H(31A)···O(4) <sup>#4</sup>  | 0.96       | 2.5          | 3.302(10)      | 141              |
| <b>Complex 2</b>                   |            |              |                |                  |
| O(5)–H(5C)···O(7) <sup>#3</sup>    | 0.84       | 1.81         | 2.649(3)       | 170              |
| O(7)–H(7A)···N(4) <sup>#1</sup>    | 0.85       | 2.36         | 2.793(16)      | 112              |
| O(7)–H(7B)···O(1) <sup>#2</sup>    | 0.84       | 1.93         | 2.741(3)       | 164              |
| C(13)–H(13B)···O(7) <sup>#1</sup>  | 0.97       | 2.58         | 3.262(4)       | 127              |

Symmetry codes

For 1: # 1:  $-1+x, 1+y, z$ ; # 2:  $-1-x, 1-y, 2-z$ ; # 3:  $x, -1+y, z$ ; # 4:  $-1+x, y, 1+z$ ; # 5:  $1+x, y, z$ ; # 6:  $-x, 1-y, 2-z$ ; # 7:  $1-x, 1-y, 1-z$ ; # 8:  $-x, -y, 2-z$ ; # 9:  $-x, 1-y, 1-z$ ; # 10:  $-x, 2-y, 1-z$ .

For 2: # 1:  $1-x, -y, -z$ ; # 2:  $1-x, 1-y, -z$ ; # 3:  $1+x, y, -1+z$ .

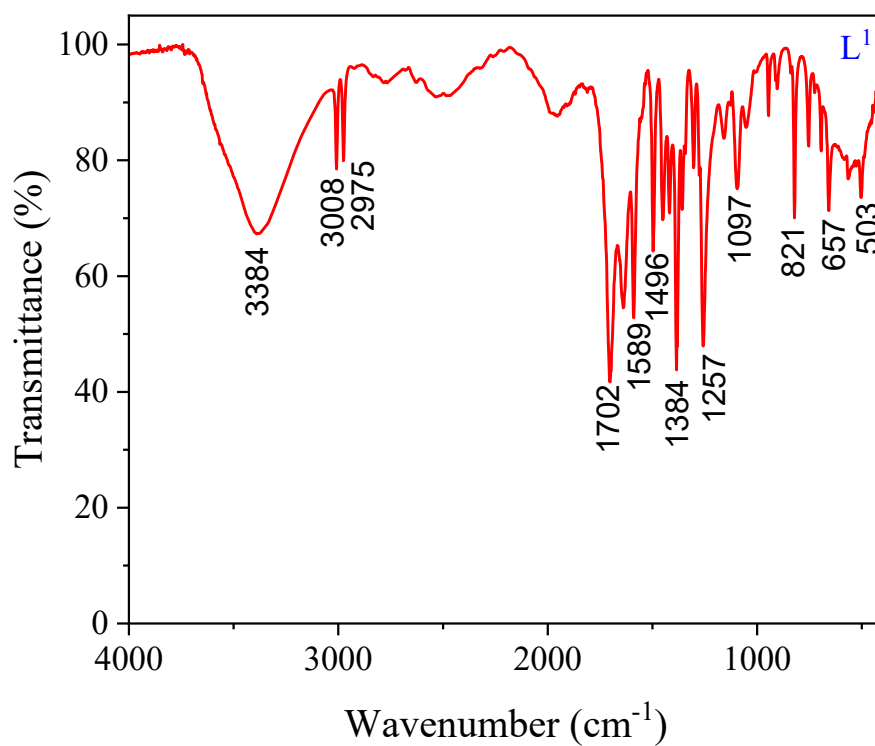

**Fig. S1** The IR spectrum of L<sup>1</sup>

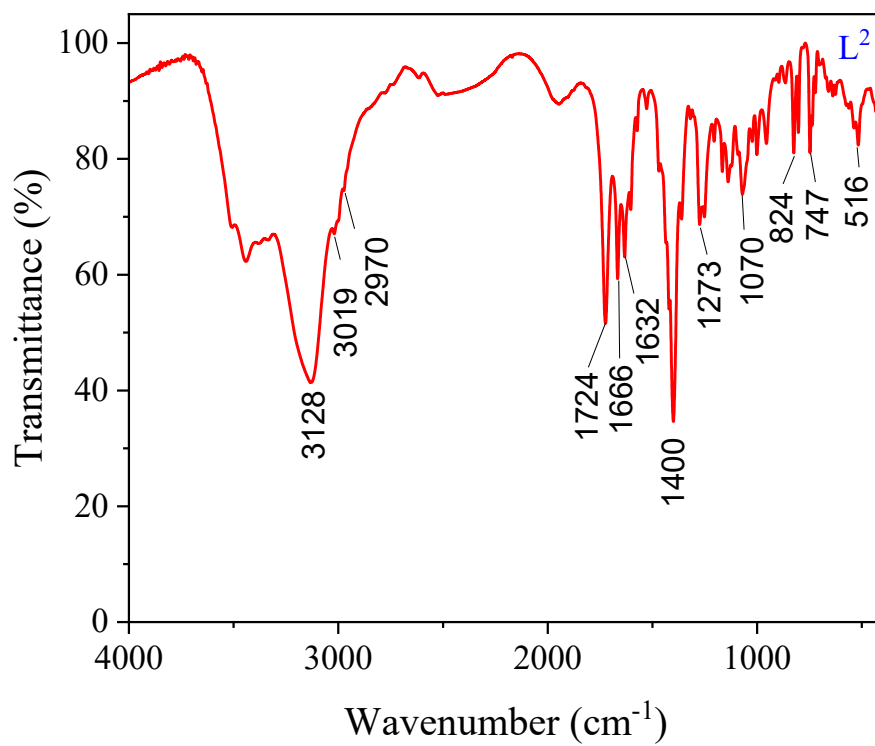

**Fig. S2** The IR spectrum of  $L^2$

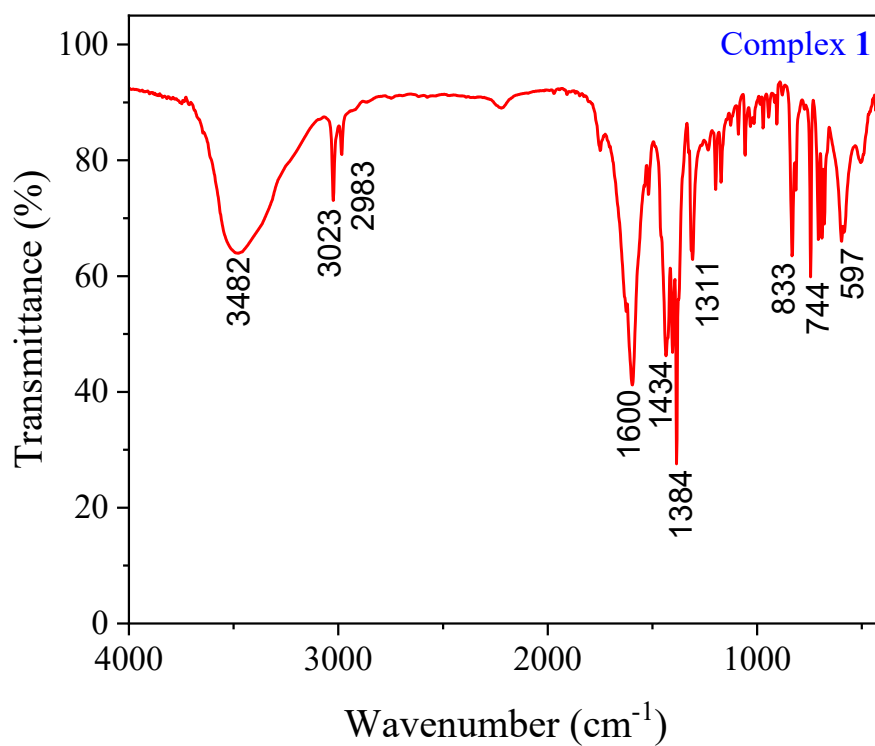

**Fig. S3** The IR spectrum of complex 1

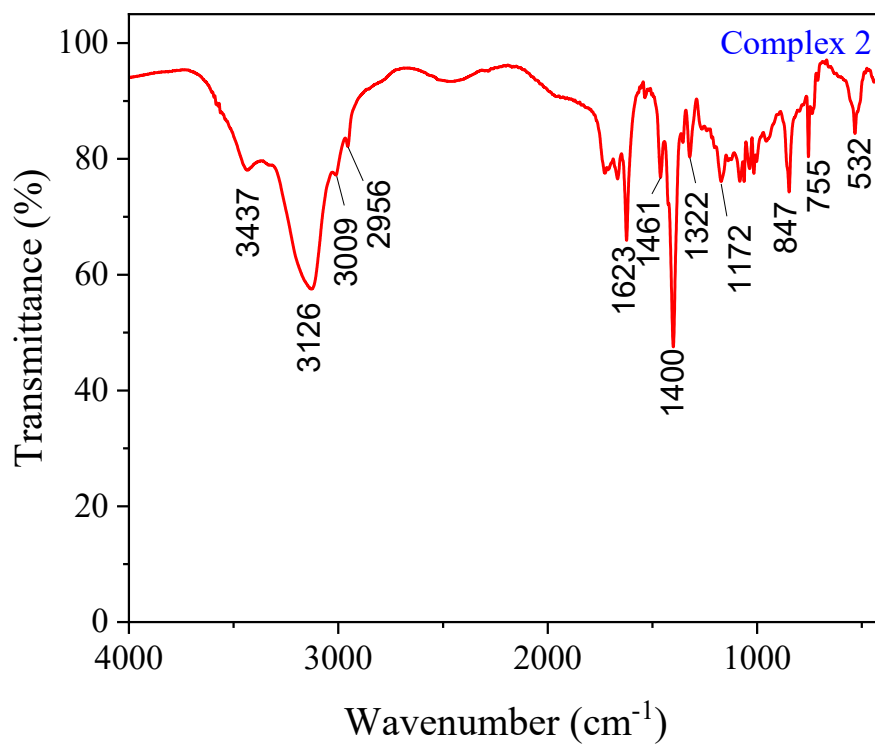

**Fig. S4** The IR spectrum of complex 2

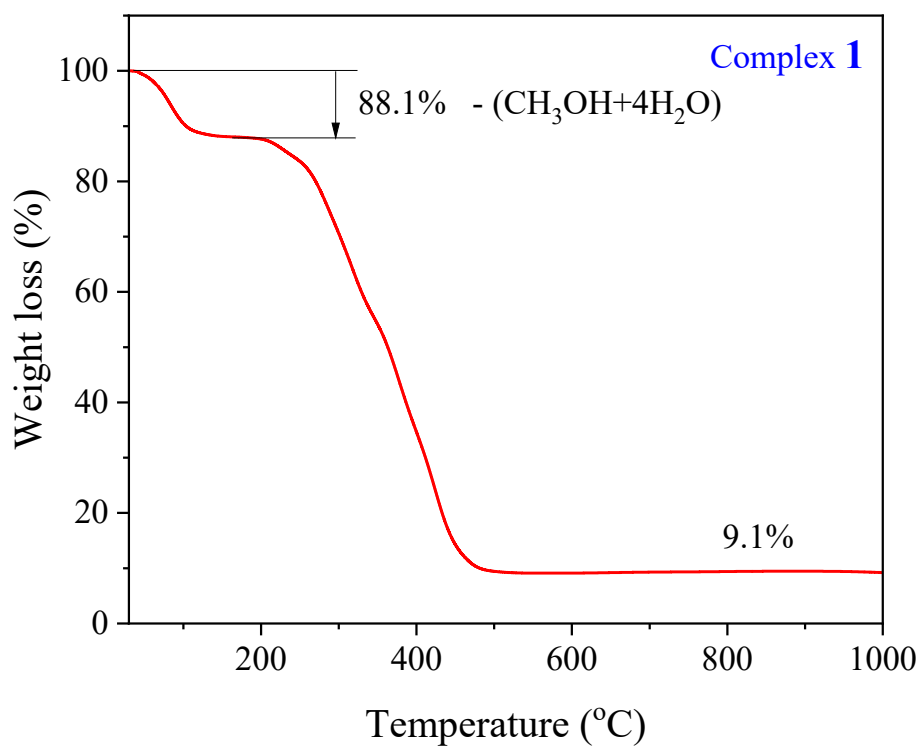

**Fig. S5** Thermogravimetric analysis curve of complex 1

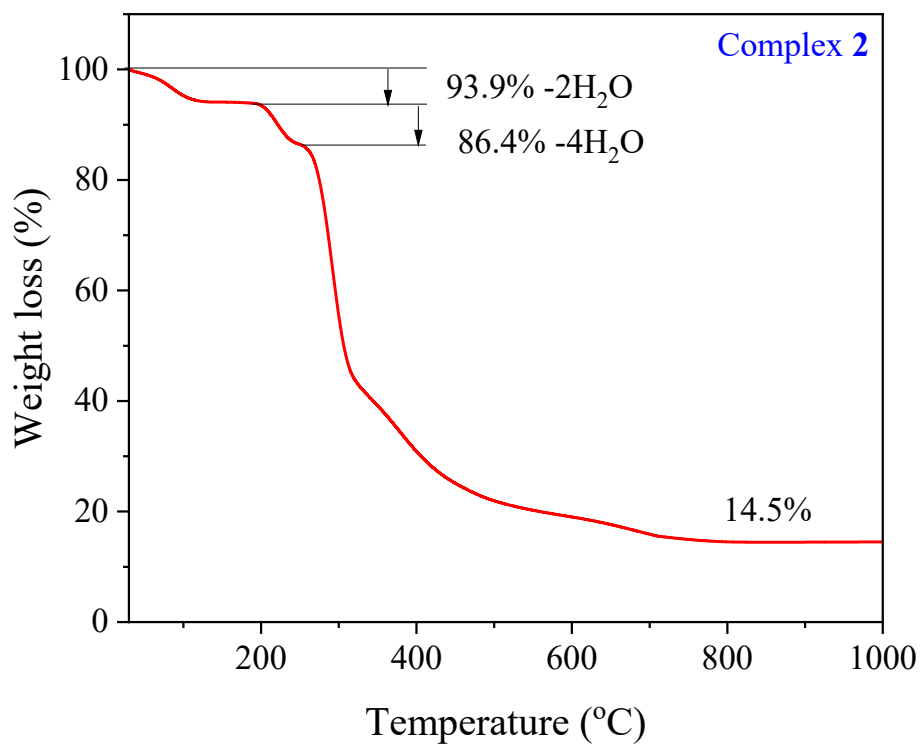

**Fig. S6** Thermogravimetric analysis curve of complex **2**

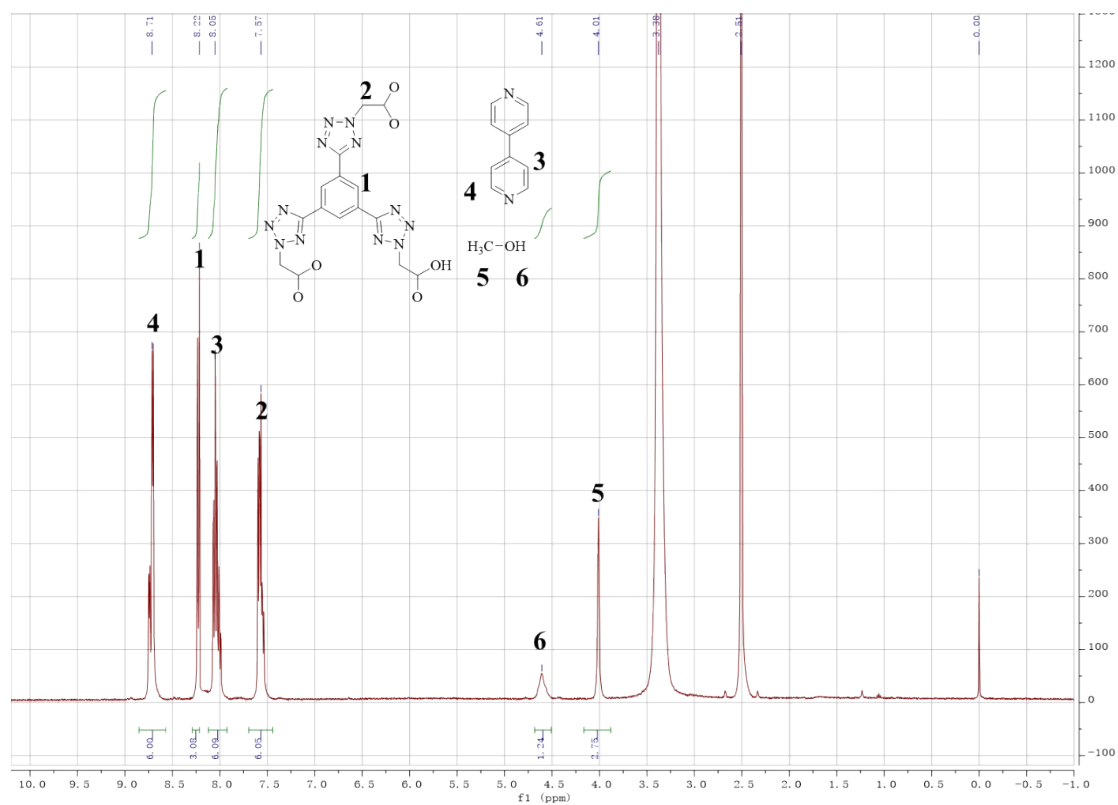

**Fig. S7**  $^1\text{H}$  NMR spectrum of complex **1**

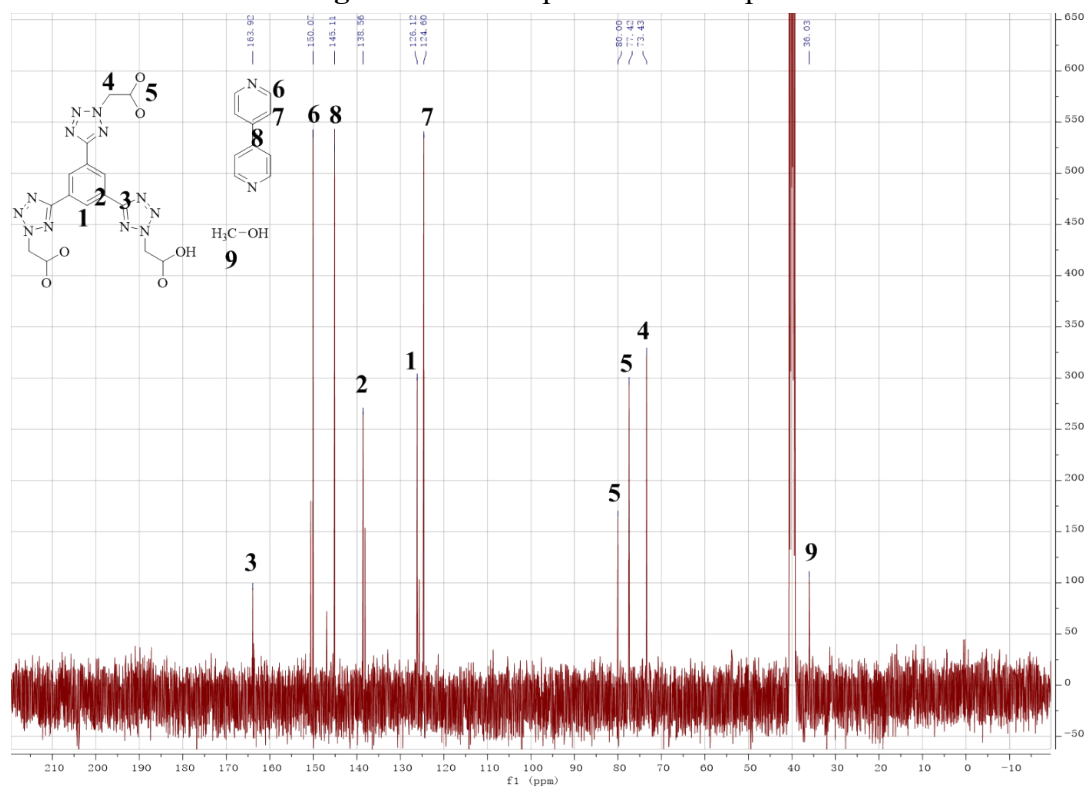

**Fig. S8**  $^{13}\text{C}$  NMR spectrum of complex **1**

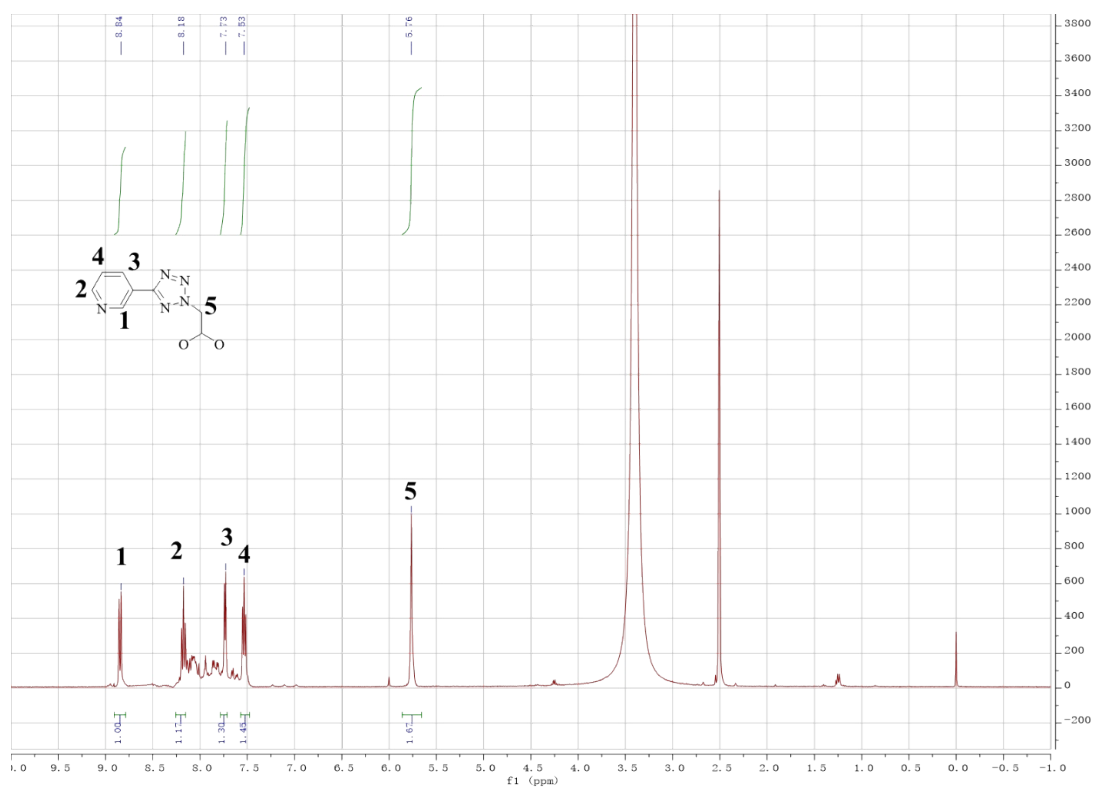

Fig. S9  $^1\text{H}$  NMR spectrum of complex 2

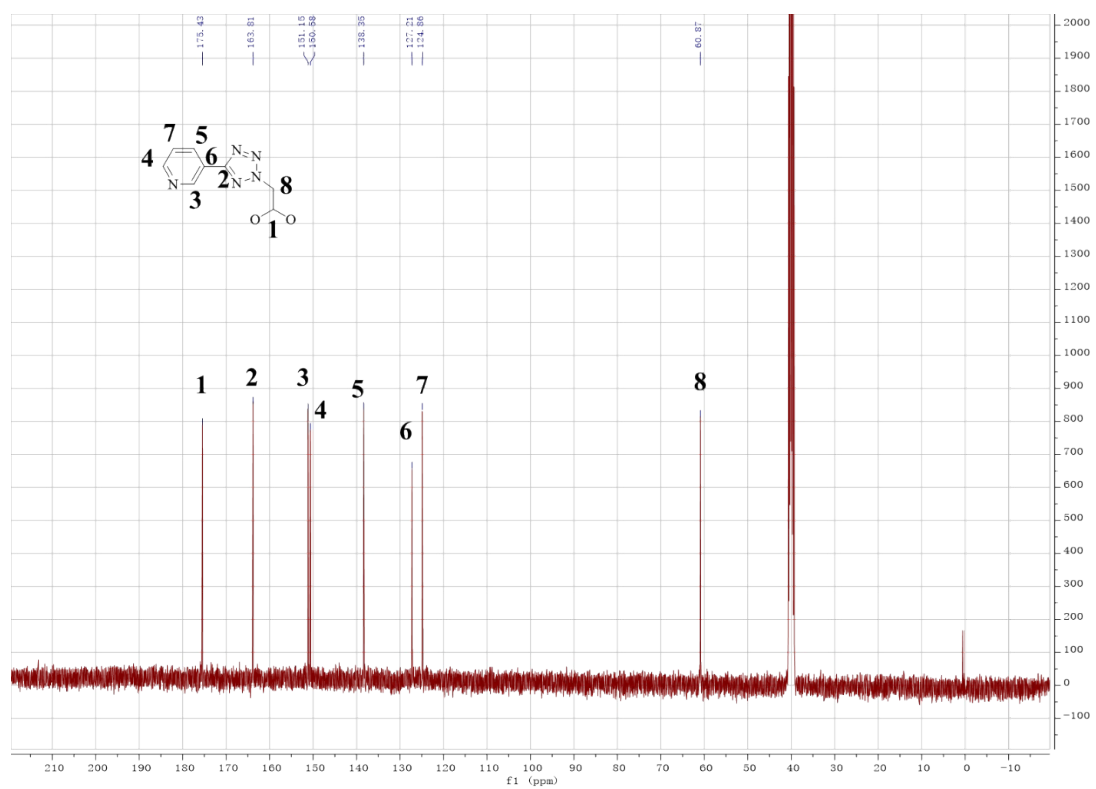

Fig. S10  $^{13}\text{C}$  NMR spectrum of complex 2



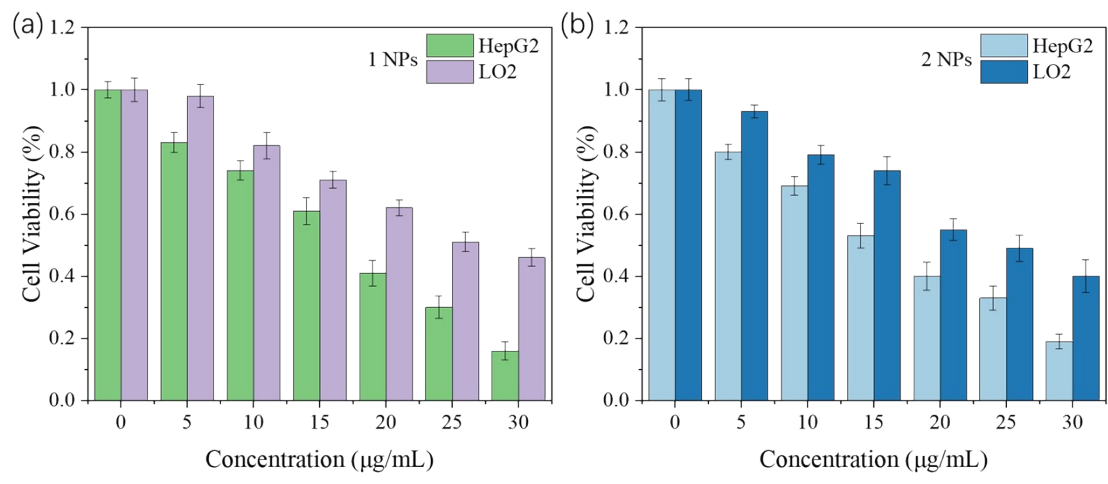

**Fig. S11** CCK-8 assay of the NPs of 1-3 for HepG2 and LO2 cells.
